# Supplementary material
Source: HighWire-hosted journal article supplement (http://jpet.aspetjournals.org/highwire/filestream/136716/field_highwire_adjunct_files/0/Supplemental_234765.pdf)
Supplement: Supplemental_234765.pdf [file Supplemental_234765.pdf]

**The Journal of Pharmacology and Experimental Therapeutics**

**CS-3150, a novel non-steroidal mineralocorticoid receptor antagonist, shows preventive and therapeutic effects on renal injury in DOCA/salt-induced hypertensive rats**

Kiyoshi Arai, Yuka Morikawa, Naoko Ubukata, Hiroyuki Tsuruoka, Tsuyoshi Homma

End-Organ Disease Laboratories, Daiichi Sankyo Co., Ltd, Tokyo, Japan (K.A., N.U., T.H.)

Rare Disease & LCM Laboratories, Daiichi Sankyo Co., Ltd, Tokyo, Japan (Y.M.)

Venture Science Laboratories, Daiichi Sankyo Co., Ltd, Tokyo, Japan (H.T.)

Address correspondence to:

Kiyoshi Arai

End-Organ Disease Laboratories, Daiichi Sankyo Co., Ltd,

1-2-58 Hiromachi, Shinagawa-ku, Tokyo 140-8710, Japan

Tel.: +81 3 3492 3131; fax: +81 3 5436 8587.

E-mail: [arai.kiyoshi.ch@daiichisankyo.co.jp](mailto:arai.kiyoshi.ch@daiichisankyo.co.jp)

## Supplemental Figures

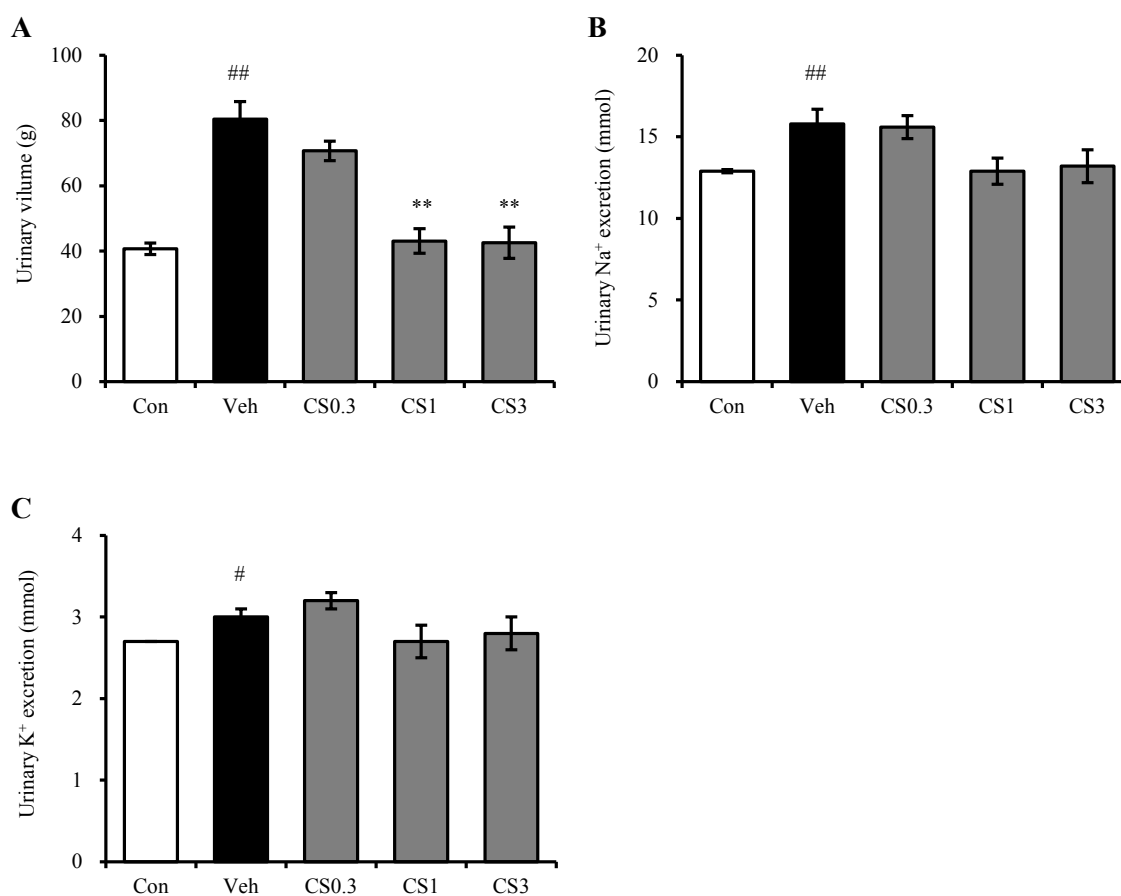

**Supplemental Fig. 1.** Effects of CS-3150 on urinary volume, Na<sup>+</sup> and K<sup>+</sup> excretions in DOCA/salt-induced hypertensive rats (in experiment 1). From 7 weeks of age, CS-3150 (0.3 to 3 mg/kg) was orally administered to DOCA rats once a day for 4 weeks. Urine was collected for 24 h at 11 weeks of age, and urinary volume (A) and Na<sup>+</sup> and K<sup>+</sup> concentrations were measured. Urinary Na<sup>+</sup> (B) and K<sup>+</sup> (C) excretions for 24 h were calculated. Con: control group (no DOCA administered). Veh: vehicle-treated group. CS0.3: CS-3150 (0.3 mg/kg)-treated group. CS1: CS-3150 (1 mg/kg)-treated group. CS3: CS-3150 (3 mg/kg)-treated group. Data are expressed as mean  $\pm$  S.E.M (N = 6 in each group). #  $P < 0.05$ , ##  $P < 0.01$  vs. control, \*\*  $P < 0.01$  vs. vehicle.

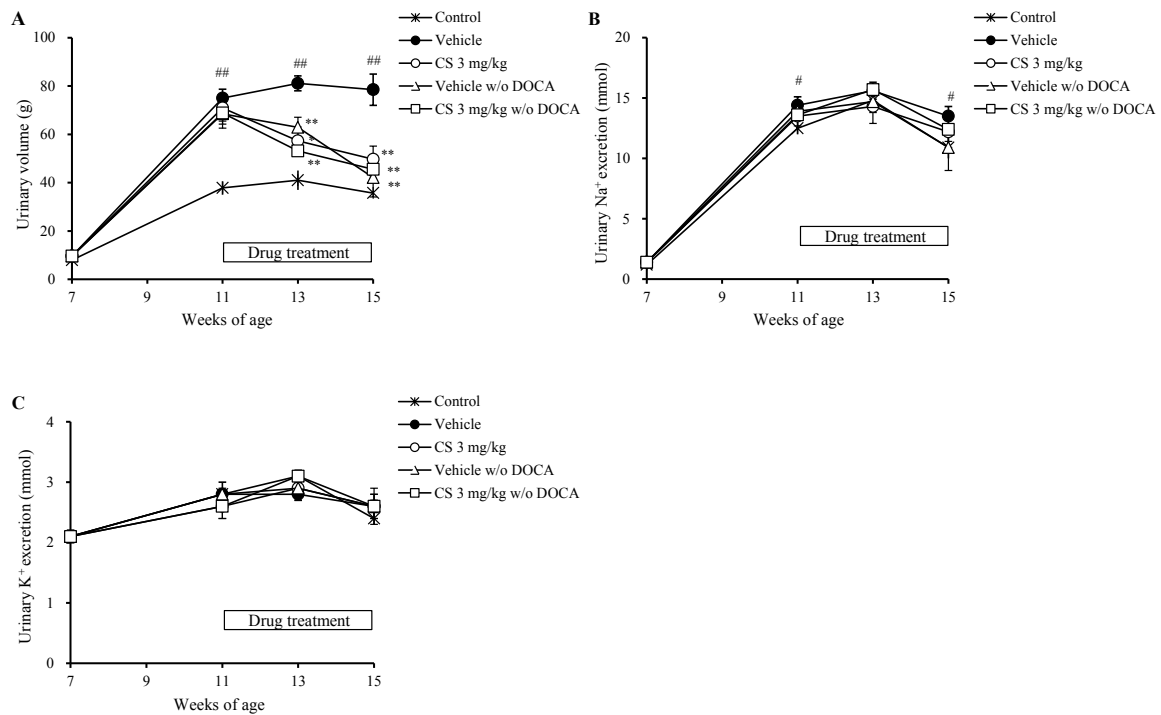

**Supplemental Fig. 2.** Effects of CS-3150 on urinary volume, Na<sup>+</sup> and K<sup>+</sup> excretions in DOCA/salt-induced hypertensive rats (in experiment 2). From 7 weeks of age, DOCA was subcutaneously administered once a week for 4 weeks to uninephrectomized rats fed a high-salt (4% NaCl) diet. From 11 weeks of age, CS-3150 (3 mg/kg) was orally administered once a day for 4 weeks with or without continuous DOCA administration. Urine was collected for 24 h at 7, 11, 13 and 15 weeks of age, and urinary volume (A) and Na<sup>+</sup> and K<sup>+</sup> concentrations were measured. Urinary Na<sup>+</sup> (B) and K<sup>+</sup> (C) excretions for 24 h were calculated. Data are expressed as mean ± S.E.M (N = 6 in each group). #  $P < 0.05$ , ##  $P < 0.01$  vs. control, \*  $P < 0.05$ , \*\*  $P < 0.01$  vs. vehicle.

**Supplemental Table 1.** Effect of CS-3150 on urinary MCP-1 excretion in DOCA/salt-induced hypertensive rats at 11 weeks of age (in experiment 1). Data are expressed as mean  $\pm$  S.E.M (N = 6 in each group). <sup>##</sup>  $P < 0.01$  vs. Control, <sup>\*\*</sup>  $P < 0.01$  vs. Vehicle. CS: CS-3150.

| Group        | Urinary MCP-1 excretion (ng/day) |
|--------------|----------------------------------|
| Control      | 1.7 $\pm$ 0.2                    |
| Vehicle      | 16.2 $\pm$ 1.9 <sup>##</sup>     |
| CS 0.3 mg/kg | 8.0 $\pm$ 0.4 <sup>**</sup>      |
| CS 1 mg/kg   | 1.9 $\pm$ 0.2 <sup>**</sup>      |
| CS 3 mg/kg   | 1.5 $\pm$ 0.1 <sup>**</sup>      |

**Supplemental Table 2.** Effect of CS-3150 on urinary MCP-1 excretion in DOCA/salt-induced hypertensive rats at 15 weeks of age (in experiment 2). Data are expressed as mean  $\pm$  S.E.M (N = 6 in each group). <sup>##</sup>  $P < 0.01$  vs. Control, <sup>\*\*</sup>  $P < 0.01$  vs. Vehicle. CS: CS-3150.

| Group               | Urinary MCP-1 excretion (ng/day) |
|---------------------|----------------------------------|
| Control             | 1.5 $\pm$ 0.2                    |
| Vehicle             | 18.4 $\pm$ 1.8 <sup>##</sup>     |
| CS 3 mg/kg          | 2.3 $\pm$ 0.2 <sup>**</sup>      |
| Vehicle w/o DOCA    | 2.3 $\pm$ 0.1 <sup>**</sup>      |
| CS 3 mg/kg w/o DOCA | 1.3 $\pm$ 0.1 <sup>**</sup>      |
